# Supplementary material for: Parental Control, Nurturance, Self-Efficacy, and Screen Viewing among 5- to 6-Year-Old Children: A Cross-Sectional Mediation Analysis To Inform Potential Behavior Change Strategies
Source: PubMed Central journal article supplement (PMC4382711; doi:10.1089/chi.2014.0110), 2015-04-01
Supplement: Supp_Table1.pdf [file Supp_Table1.pdf]

## Supplementary Data

**Supplementary Table 1. Characteristics of and Number of Screen Viewing Devices in the Homes of Participants Included in Analysis versus Participants Excluded**

|                                     | Mean            | SD   | Mean            | SD   | Difference in means        | 95% CI         | p value <sup>†</sup> |
|-------------------------------------|-----------------|------|-----------------|------|----------------------------|----------------|----------------------|
| <b>Adults</b>                       | <b>Included</b> |      | <b>Excluded</b> |      |                            |                |                      |
| Age (years)                         | 37.9            | 5.7  | 36.5            | 5.6  | -1.38                      | -2.53 to -0.23 | 0.02                 |
| BMI                                 | 25.5            | 4.6  | 24.6            | 4.3  | -0.86                      | -1.73 to 0.01  | 0.05                 |
| IMD score <sup>a</sup>              | 14.3            | 12.1 | 17.9            | 15.4 | 3.62                       | 1.74 to 5.51   | <b>&lt;0.001</b>     |
| Parental self-efficacy to limit SV  | 13.6            | 1.7  | 13.3            | 2.0  | -0.42                      | -0.75 to -0.08 | <b>0.01</b>          |
| Parental control                    | 3.7             | 1.1  | 3.1             | 1.1  | -0.53                      | -0.85 to -0.21 | <b>0.001</b>         |
| Parental nurturance                 | 31.8            | 3.9  | 31.1            | 4.7  | -0.66                      | -1.46 to 0.14  | 0.10                 |
| Media equipment (all)               | 13.1            | 5.3  | 12.4            | 5.7  | -0.72                      | -1.74 to 0.30  | 0.17                 |
| TVs                                 | 4.8             | 2.4  | 5.1             | 2.6  | 0.26                       | -0.19 to 0.72  | 0.26                 |
| PCs (including laptops and tablets) | 2.3             | 1.4  | 1.9             | 1.3  | -0.42                      | -0.69 to -0.16 | <b>0.002</b>         |
| Games consoles                      | 2.3             | 1.7  | 2.3             | 1.7  | 0.02                       | -0.30 to 0.35  | 0.89                 |
| Music players                       | 2.4             | 1.7  | 2.0             | 1.5  | -0.33                      | -0.65 to -0.01 | <b>0.04</b>          |
| Smart phones                        | 1.4             | 1.0  | 1.2             | 1.0  | -0.18                      | -0.36 to 0.09  | <b>0.06</b>          |
| <b>Children</b>                     | <b>Included</b> |      | <b>Excluded</b> |      | <b>Difference in means</b> | <b>95% CI</b>  | <b>p value*</b>      |
| Age (years)                         | 6.0             | 0.43 | 6.0             | 0.23 | 0.015                      | -0.03 to 0.06  | 0.55                 |
| BMI z-score                         | 0.24            | 0.93 | 0.34            | 0.10 | 0.100                      | -0.02 to 0.22  | 0.10                 |

<sup>a</sup>A high score shows greater levels of social deprivation.

\*p value from t-tests.

IMD, index of multiple deprivation; SV, screen viewing; TVs, televisions; PCs, personal computers; SD, standard deviation; CI, confidence interval.
