# Supplementary material for: Parental Control, Nurturance, Self-Efficacy, and Screen Viewing among 5- to 6-Year-Old Children: A Cross-Sectional Mediation Analysis To Inform Potential Behavior Change Strategies
Source: PubMed Central journal article supplement (PMC4382711; doi:10.1089/chi.2014.0110), 2015-04-01
Supplement: Supp_Table2.pdf [file Supp_Table2.pdf]

**Supplementary Table 2. Logistic Regression Predicting Child TV Watching Behavior on Weekend Days by Parental Control and Parental Nurturance, with Parental Efficacy To Restrict Screen Viewing as a Potential Mediator**

| <b>Parental control</b>                                                                          | <b>Adjusted<sup>a</sup> (with clustering)</b>           |                       |                    |
|--------------------------------------------------------------------------------------------------|---------------------------------------------------------|-----------------------|--------------------|
| Step 1: Outcome = child TV on weekend days <sup>b</sup><br>Parental control (C)                  | OR<br>0.90                                              | 95% CI<br>0.79–1.01   | <i>p</i><br>0.083  |
|                                                                                                  | Pseudo- <i>R</i> <sup>2</sup> , 0.110; <i>p</i> < 0.001 |                       |                    |
| Step 2a: Predictor: parental control<br>a) Outcome: Efficacy to influence screen viewing (A1)    | Coeff<br>0.25                                           | 95% CI<br>0.14–0.36   | <i>p</i><br><0.001 |
|                                                                                                  | <i>R</i> <sup>2</sup> , 0.032; <i>p</i> < 0.001         |                       |                    |
| Step 2b: Mediator on outcome<br>Efficacy to influence screen viewing (B)                         | OR<br>0.88                                              | 95% CI<br>0.82–0.95   | <i>p</i><br>0.001  |
|                                                                                                  | Pseudo- <i>R</i> <sup>2</sup> , 0.115; <i>p</i> < 0.001 |                       |                    |
| Step 3: Outcome = child TV on weekend days <sup>b</sup><br>Parental control (C')                 | OR<br>0.92                                              | 95% CI<br>0.81–1.04   | <i>p</i><br>0.194  |
| Efficacy to influence screen viewing                                                             | 0.89                                                    | 0.82–0.96             | 0.002              |
|                                                                                                  | <i>R</i> <sup>2</sup> , 0.116; <i>p</i> < 0.001         |                       |                    |
| Mediation statistics:                                                                            |                                                         | Bias-corrected 95% CI |                    |
| Indirect effect                                                                                  | –0.02                                                   | –0.04 to –0.01        |                    |
| Proportion of total effect mediated                                                              | 0.26                                                    |                       |                    |
| <b>Parental nurturance</b>                                                                       | <b>Adjusted<sup>a</sup> (with clustering)</b>           |                       |                    |
| Step 1: Outcome = Child TV on weekend days <sup>b</sup><br>Parental nurturance (C)               | OR<br>0.99                                              | 95% CI<br>0.96–1.03   | <i>p</i><br>0.720  |
|                                                                                                  | Pseudo- <i>R</i> <sup>2</sup> 0.108; <i>p</i> < 0.001   |                       |                    |
| Step 2a: Predictor: parental nurturance<br>a) Outcome: efficacy to influence screen viewing (A1) | Coeff<br>0.12                                           | 95% CI<br>0.09–0.15   | <i>p</i><br><0.001 |
|                                                                                                  | <i>R</i> <sup>2</sup> , 0.083; <i>p</i> < 0.001         |                       |                    |
| Step 2b: Mediator on outcome<br>Efficacy to influence screen viewing (B)                         | OR<br>0.88                                              | 95% CI<br>0.82–0.95   | <i>p</i><br>0.001  |
|                                                                                                  | Pseudo- <i>R</i> <sup>2</sup> , 0.115; <i>p</i> < 0.001 |                       |                    |
| Step 3: Outcome = child TV on weekend days <sup>b</sup><br>Parental nurturance (C')              | OR<br>1.01                                              | 95% CI<br>0.97–1.05   | <i>p</i><br>0.665  |
| Efficacy to influence screen viewing                                                             | 0.88                                                    | 0.81–0.95             | 0.002              |
|                                                                                                  | <i>R</i> <sup>2</sup> , 0.115; <i>p</i> < 0.001         |                       |                    |
| Mediation statistics:                                                                            |                                                         | Bias-corrected 95% CI |                    |
| Indirect effect                                                                                  | –0.03                                                   | –0.05 to –0.01        |                    |
| Proportion of total effect mediated                                                              | 2.34                                                    |                       |                    |

<sup>a</sup>Adjusted for child BMI z-score, IMD, and parental weekend TV viewing.

<sup>b</sup>> 2 hours versus 2 hours or less.

TV, television; IMD, index of multiple deprivation; OR, odds ratio; Coeff, coefficient; CI, confidence interval.
