# Supplementary material for: Parental Control, Nurturance, Self-Efficacy, and Screen Viewing among 5- to 6-Year-Old Children: A Cross-Sectional Mediation Analysis To Inform Potential Behavior Change Strategies
Source: PubMed Central journal article supplement (PMC4382711; doi:10.1089/chi.2014.0110), 2015-04-01
Supplement: Supp_Table3.pdf [file Supp_Table3.pdf]

### Supplementary Table 3. Logistic Regression Predicting Child PC Use on Weekend Days by Parental Control and Parental Nurturance, with Parental Efficacy To Restrict Screen Viewing as a Potential Mediator

| Parental control                                                                                 | Adjusted <sup>a</sup> (with clustering)   |                       |                   |
|--------------------------------------------------------------------------------------------------|-------------------------------------------|-----------------------|-------------------|
| Step 1: Outcome = child PC use on weekend days <sup>b</sup><br>Parental control (C)              | OR<br>1.04                                | 95% CI<br>0.95–1.15   | p<br>0.329        |
|                                                                                                  | Pseudo-R <sup>2</sup> , 0.003; p = 0.3776 |                       |                   |
| Step 2a: Predictor: parental control<br>(a) Outcome: Efficacy to influence screen viewing (A1)   | Coeff<br>0.25                             | 95% CI<br>0.14–0.36   | p<br><0.001       |
|                                                                                                  | R <sup>2</sup> 0.035; p < 0.001           |                       |                   |
| Step 2b: Mediator on outcome<br>Efficacy to influence screen viewing (B)                         | OR<br>0.95                                | 95% CI<br>0.87–1.03   | p<br>0.208        |
|                                                                                                  | Pseudo R <sup>2</sup> , 0.004; p = 0.2576 |                       |                   |
| Step 3: Outcome = child PC use on weekend days <sup>b</sup><br>Parental control (C')             | OR<br>1.06                                | 95% CI<br>0.97–1.17   | p<br>0.206        |
| Efficacy to influence screen viewing                                                             | 0.94                                      | 0.87–1.03             | 0.165             |
|                                                                                                  | R <sup>2</sup> , 0.05; p = 0.2724         |                       |                   |
| Mediation statistics:                                                                            |                                           | Bias-corrected 95% CI |                   |
| Indirect effect                                                                                  | –0.01                                     | –0.02 to 0.002        |                   |
| Proportion of total effect mediated                                                              | –0.32                                     |                       |                   |
| Parental nurturance                                                                              | Adjusted <sup>a</sup> (with clustering)   |                       |                   |
| Step 1: Outcome = child PC use on weekend days <sup>b</sup><br>Parental nurturance (C)           | OR<br>0.99                                | 95% CI<br>0.95–1.03   | p<br>0.721        |
|                                                                                                  | Pseudo-R <sup>2</sup> , 0.031; p = 0.4179 |                       |                   |
| Step 2a: Predictor: parental nurturance<br>(a) Outcome: efficacy to influence screen viewing (A) | Coeff<br>0.12                             | 95% CI<br>0.09–0.15   | p<br><0.001       |
|                                                                                                  | R <sup>2</sup> , 0.089; p < 0.001         |                       |                   |
| Step 2b: Mediator on outcome<br>Efficacy to influence screen viewing (B)                         | OR<br>0.94                                | 95% CI<br>0.87–1.03   | p<br><b>0.208</b> |
|                                                                                                  | Pseudo-R <sup>2</sup> , 0.004; p = 0.2576 |                       |                   |
| Step 3: Outcome = child PC use on weekend days <sup>b</sup><br>Parental nurturance (C')          | OR<br>1.00                                | 95% CI<br>0.96–1.04   | p<br>0.967        |
| Efficacy to influence screen viewing                                                             | 0.95                                      | 0.87–1.04             | <b>0.242</b>      |
|                                                                                                  | R <sup>2</sup> , 0.043; p = 0.3713        |                       |                   |
| Mediation statistics:                                                                            |                                           | Bias-corrected 95% CI |                   |
| Indirect effect                                                                                  | –0.01                                     | –0.04 to 0.006        |                   |
| Proportion of total effect mediated                                                              | 0.88                                      |                       |                   |

<sup>a</sup>Adjusted for child BMI z-score, IMD, and parental weekend PC use.

<sup>b</sup>Some use versus no use.

PC, personal computer; IMD, index of multiple deprivation; OR, odds ratio; Coeff, coefficient; CI, confidence interval.
